# Supplementary material for: Predicting Culex pipiens/restuans Population Dynamics Using a Weather-Driven Dynamic Compartmental Population Model
Source: MDPI journal article supplement (doi:10.3390/insects14030293), 2023-03-17

## Supplementary Information

Figure S1: Validation of the stability of root-mean-square error (RMSE) depending on the number of iterations and runs

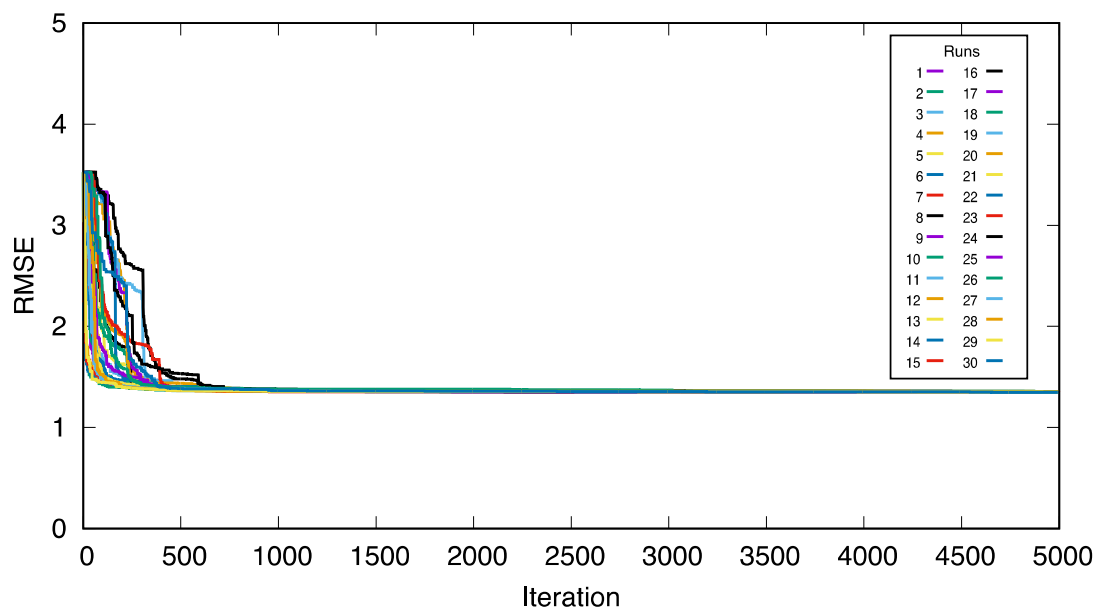

Supplement: s1 [file s1]
